# Supplementary material for: High-performance carbon-based perovskite solar cells through the dual role of PC61BM
Source: Royal Society of Chemistry journal article supplement (doi:10.1039/c9qi00693a), 2019-01-01
Supplement: c9qi00693a1.pdf [file c9qi00693a1.pdf]

## Supporting information

### High Performance Carbon-based Perovskite Solar Cells by the Dual Role of PC<sub>61</sub>BM

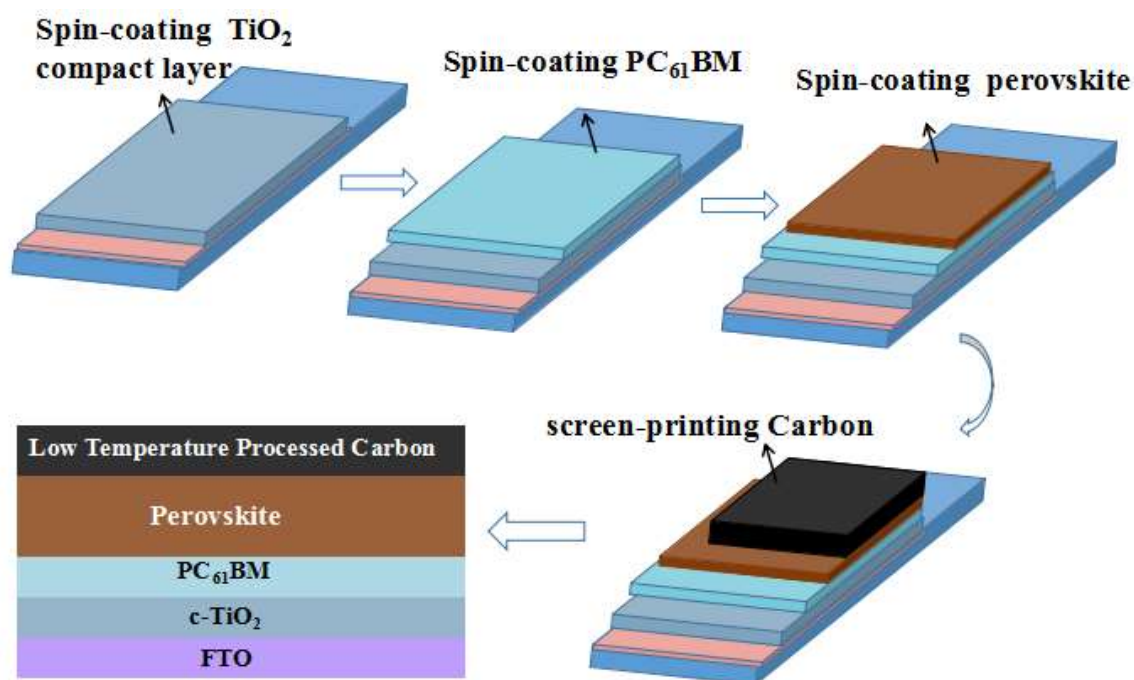

Figure S1. Production process of carbon-based HTM-free PSC using PC<sub>61</sub>BM/c-TiO<sub>2</sub> as ETL.

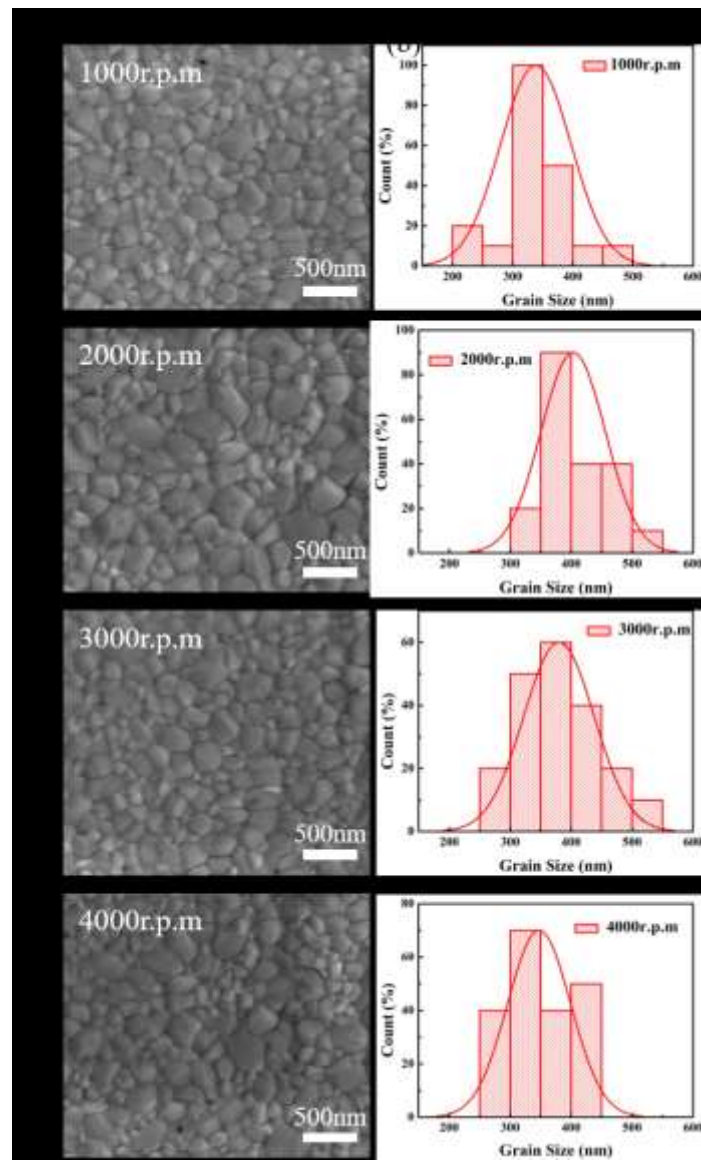

Figure S2. Top view SEM images of perovskite film corresponding to PC<sub>61</sub>BM at 1000r.p.m,2000r.p.m,3000r.p.m,4000r.p.m.(a) and corresponding grain size distributions histogram(b).

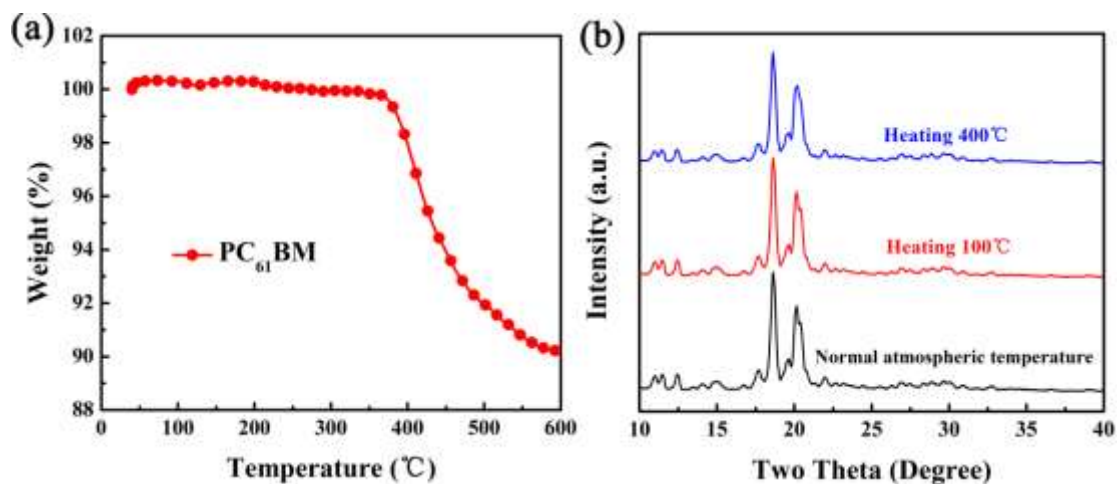

Figure S3. (a) Thermogravimetric analysis of PC<sub>61</sub>BM powder and (b) X-ray diffraction (XRD) spectra of PC<sub>61</sub>BM powder under different conditions

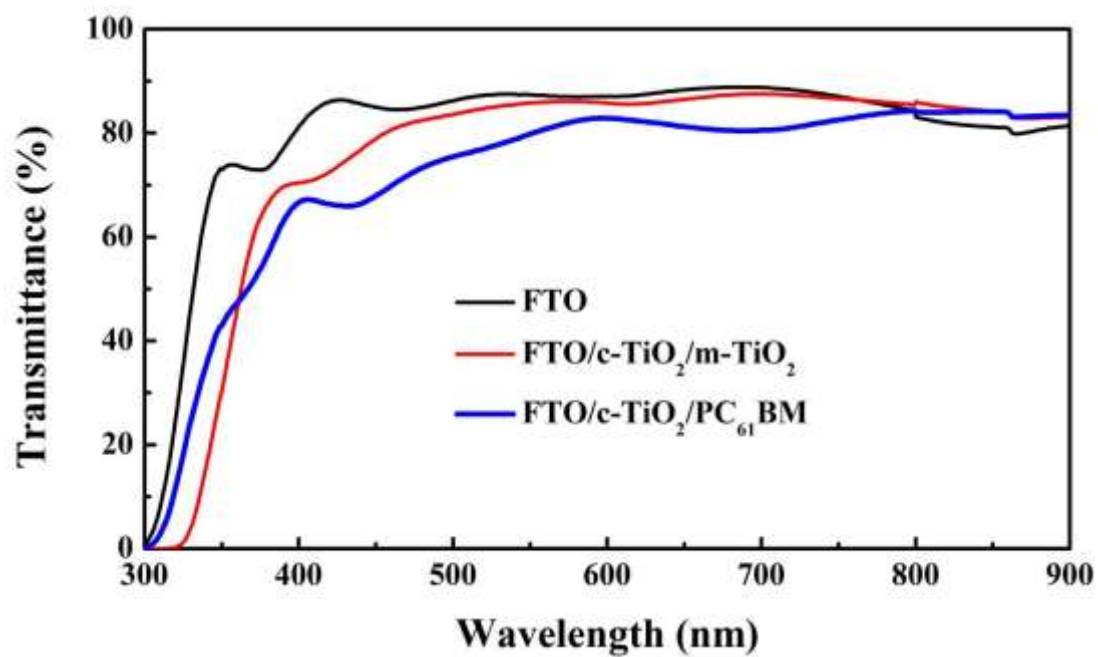

Figure S4. Transmittance spectra of the FTO/c-TiO<sub>2</sub>/PC<sub>61</sub>BM film and control samples.

Table S1. The bi-exponential fitting parameters of photoluminescence data

| Sample                                      | $A_1$ | $\tau_1$ (ns) | $A_2$ | $\tau_2$ (ns) | $\tau_{avg}$ (ns) |
|---------------------------------------------|-------|---------------|-------|---------------|-------------------|
| FTO/c-TiO <sub>2</sub> /m-TiO <sub>2</sub>  | 9.77  | 22            | 90.23 | 81            | 75                |
| FTO/c-TiO <sub>2</sub> /PC <sub>61</sub> BM | 0.54  | 20.420        | 0.46  | 102.07        | 58                |

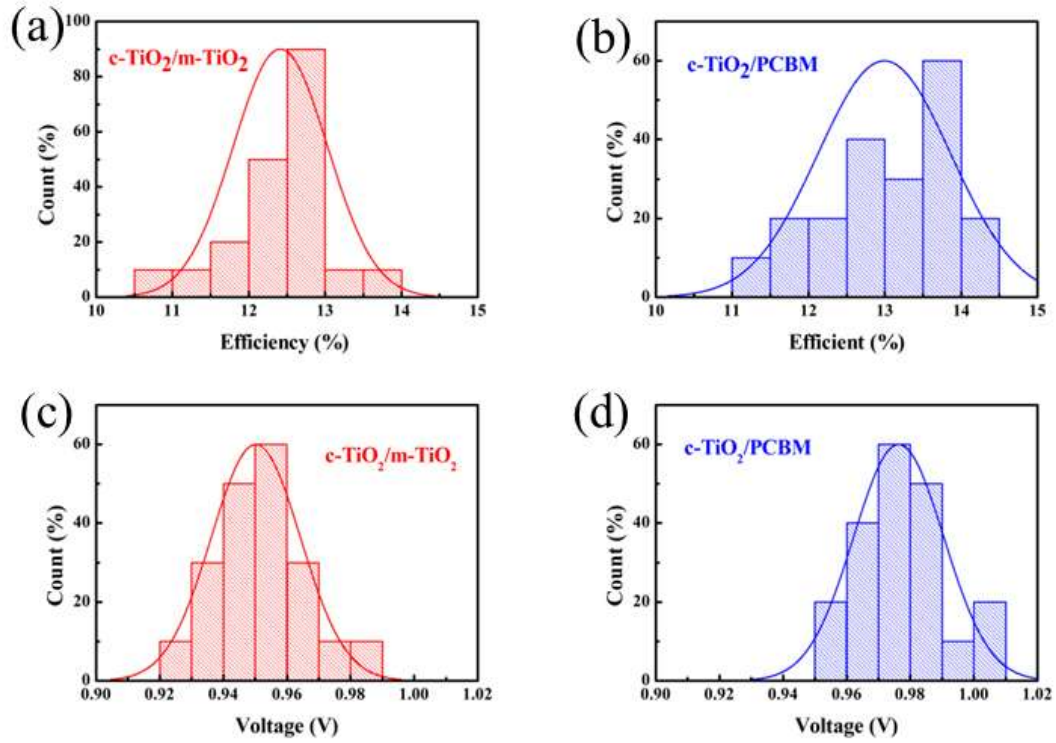

Figure S5. Histogram of PCE and  $V_{oc}$  for c-TiO<sub>2</sub>/m-TiO<sub>2</sub>-based cells and c-TiO<sub>2</sub>/PC<sub>61</sub>BM-based cells

Table S2 Statistics on the performance of 30 individual devices of each type.

| ETL                                     | $V_{oc}$ (V)    | PCE (%)          |
|-----------------------------------------|-----------------|------------------|
| c-TiO <sub>2</sub> /m-TiO <sub>2</sub>  | $0.94 \pm 0.04$ | $12.35 \pm 1.53$ |
| c-TiO <sub>2</sub> /PC <sub>61</sub> BM | $0.98 \pm 0.03$ | $13 \pm 1.37$    |
